# Supplementary material for: Machine Learning im Bildungskontext: Evidenz für die Genauigkeit der automatisierten Beurteilung von Essays im Fach Englisch
Source: Atypon-hosted journal article supplement (doi:10.1024/1010-0652/a000296), 2020-12-10
Supplement: 1010-0652_a000296_esm1.pdf [file 1010-0652_a000296_esm1.pdf]

## Elektronisches Supplement 1

**Tabelle E1.** Liste der in CTAP verwendeten linguistischen Textmerkmale und Beschreibung auf Englisch, sowie deutsche Übersetzung

|   | Linguistisches Feature aus CTAP                                  | Beschreibung aus CTAP                                                                                                                                               | Beschreibung auf Deutsch                                                                                                                                                |
|---|------------------------------------------------------------------|---------------------------------------------------------------------------------------------------------------------------------------------------------------------|-------------------------------------------------------------------------------------------------------------------------------------------------------------------------|
| 1 | Number of syllable                                               | Calculates the number of syllables in the text.                                                                                                                     | Berechnet die Anzahl der Silben im Text.                                                                                                                                |
| 2 | Number of Tokens with More Than 2 Syllables                      | Calculates number of words tokens with more than 2 syllables.                                                                                                       | Berechnet die Anzahl der Token mit mehr als 2 Silben.                                                                                                                   |
| 3 | Lexical Sophistication Feature: Thorndike Lorge (AW Type)        | This feature calculates lexical sophistication with the Thorndike-Lorge norm list of frequencies (1944), which is included in the MRC Psycholinguistic Database.    | Berechnet die lexikalische Komplexität mit der <i>Thorndike-Lorge norm list of frequencies</i> (1944), die in der psycholinguistischen Datenbank des MRC enthalten ist. |
| 4 | Lexical Sophistication Feature: SUBTLEX Word Frequency (AW Type) | This feature calculates lexical sophistication with the SUBTLEX word frequency list of all words (AW).                                                              | Berechnet die lexikalische Komplexität mit der <i>SUBTLEX word frequency list of all words</i> (AW).                                                                    |
| 5 | Lexical Sophistication Feature: Brown (AW Type)                  | This feature calculates lexical sophistication with the Brown norm list of frequencies by Brown (1984), which is included in the MRC Psycholinguistic Database.     | Berechnet die lexikalische Komplexität mit der <i>Brown norm list of frequencies</i> von Brown (1984), die in der MRC Psycholinguistic Database enthalten ist.          |
| 6 | Number of Word Types with More Than 2 Syllables                  | Calculate number of words types with more than 2 syllables.                                                                                                         | Berechnet die Anzahl der Worttypen mit mehr als zwei Silben.                                                                                                            |
| 7 | Number Of Letter                                                 | Count the number of letters in the document.                                                                                                                        | Zählt die Anzahl der Buchstaben im Dokument.                                                                                                                            |
| 8 | Lexical Sophistication Feature: Kucera and Francis (AW Type)     | This feature calculates lexical sophistication with the Kucera and Francis norm list of frequencies (1967), which is included in the MRC Psycholinguistic Database. | Berechnet lexikalische Komplexität mit der <i>Kucera and Francis norm list of frequencies</i> (1967), die in der psycholinguistischen Datenbank der MRC enthalten ist.  |

|    |                                                                    |                                                                                                                                                                            |                                                                                                                                                                                                                  |
|----|--------------------------------------------------------------------|----------------------------------------------------------------------------------------------------------------------------------------------------------------------------|------------------------------------------------------------------------------------------------------------------------------------------------------------------------------------------------------------------|
| 9  | Lexical Sophistication Feature: SUBTLEX Logarithmic Word Frequency | This feature calculates lexical sophistication with the SUBTLEX word frequency list (Log10 word frequency measure) of functional words (FW).                               | Berechnet lexikalische Komplexität mit der <i>SUBTLEX word frequency list</i> (Log10 word frequency measure) of <i>functional words</i> (FW).                                                                    |
| 10 | SD Token Length in Letters                                         | Calculates the standard deviation of token length in number of letters.                                                                                                    | Berechnet die Standardabweichung der Tokenlänge in Anzahl der Buchstaben.                                                                                                                                        |
| 11 | POS Density Feature: Singular Noun                                 | Calculates singular noun density of the text. Singular nouns include the Penn Treebank tag NN. Formula: $NNDensity = \frac{numNNs}{numTokens}$ .                           | Berechnet die Singularitätsdichte des Textes. Singulare Substantive enthalten das Penn Treebank-Kennzeichen NN. Formel: $NNDichte = \frac{AnzahlNNs}{AnzahlToken}$ .                                             |
| 12 | Number of Syntactic Constituents: Verb Phrase                      | Calculates the number of a specific syntactic constituents in the text. This feature counts the number of verb phrases in the text.                                        | Berechnet die Anzahl eines bestimmten syntaktischen Bestandteils im Text. Diese Funktion zählt die Anzahl der Verbalphrasen im Text.                                                                             |
| 13 | Lexical Sophistication Feature: Age of Acquisition (FW Type)       | This feature calculates lexical sophistication with the Age of Acquisition norm list by Gilhooly and Logie (1980), which is included in the MRC Psycholinguistic Database. | Berechnet die lexikalische Komplexität mit der <i>Age of Acquisition normlist</i> von Gilhooly und Logie (1980), die in der psycholinguistischen Datenbank des MRC enthalten ist.                                |
| 14 | Number of Word Types                                               | Calculates the number of word types. A word type is a non-duplicated token.                                                                                                | Berechnet die Anzahl der Worttypen. Ein Worttyp ist ein nicht-dupliziertes Token.                                                                                                                                |
| 15 | POS Density Feature: Possessive Ending                             | Calculates possessive ending density of the text. Possessive endings include the Penn Treebank tag POS. Formula: $POSDensity = \frac{numPOSS}{numTokens}$ .                | Berechnet die Dichte der possessiven Endungen des Textes. Possessive Endungen beinhalten das Penn Treebank-Kennzeichen POS. Formel: $POSDichte = \frac{AnzahlPOS}{Anzahl\ der\ Token}$ .                         |
| 16 | POS Density Feature: Noun                                          | Calculates noun density of the text. Nouns include the Penn Treebank tags NN, NNS, NNP and NNPS. Formula: $nounDensity = \frac{numNouns}{numTokens}$ .                     | Berechnet die Dichte der Substantive des Textes. Substantive beinhalten die Penn Treebank-Kennzeichen NN, NNS, NNP und NNPS. Formel: $SubstantivDichte = \frac{Anzahl\ der\ Substantiven}{Anzahl\ der\ Token}$ . |
| 17 | POS Density Feature: Superlative Adjective                         | Calculates superlative adjective density of the text. Superlative adjectives include the Penn Treebank tag JJS. Formula: $JJSDensity = \frac{numJJS}{numTokens}$ .         | Berechnet die Dichte von Adjektiven im Superlativ des Textes. Adjektive im Superlativ beinhalten das Penn Treebank-Kennzeichen JJS. Formel: $JJSDichte = \frac{AnzahlJJS}{Anzahl\ der\ Token}$ .                 |

|    |                                                     |                                                                                                                                                              |                                                                                                                                                                                           |
|----|-----------------------------------------------------|--------------------------------------------------------------------------------------------------------------------------------------------------------------|-------------------------------------------------------------------------------------------------------------------------------------------------------------------------------------------|
|    | POS Density Feature: Determiner DT                  | Calculates determiner DT density of the text. Determiner DTs include the Penn Treebank tag DT. Formula: $DTDensity = numDT / numTokens$ .                    | Berechnet die Determinanten-Dichte des Textes. Determinanten beinhalten das Penn Treebank-Kennzeichen DT. Formel: $DTDichte = AnzahlDT / Anzahl\ der\ Token$ .                            |
| 18 | Percentage of Word Types with More Than 2 Syllables | Calculates the percentage of words types with more than 2 syllables.                                                                                         | Berechnet den Anteil der Worttypen mit mehr als zwei Silben.                                                                                                                              |
| 19 | POS Density Feature: Comparative Adjective          | Calculates comparative adjective density of the text. Comparative adjectives include the Penn Treebank tag JJR. Formula: $JJRDensity = numJJR / numTokens$ . | Berechnet die Dichte der Adjektive im Komparativ des Textes. Adjektive im Komparativ beinhalten das Penn Treebank-Kennzeichen JJR. Formel: $JJRDichte = AnzahlJJR / Anzahl\ der\ Token$ . |
| 20 | Mean Token Length in Letters                        | Calculates the mean token length in letters.                                                                                                                 | Berechnet die mittlere Tokenlänge in Buchstaben.                                                                                                                                          |
| 21 | Mean Sentence Length in Tokens                      | Calculates the mean sentence length in number of letters.                                                                                                    | Berechnet die mittlere Satzlänge in Buchstaben.                                                                                                                                           |
| 22 | POS Density Feature: Past Participle Verb           | Calculates past participle verb density of the text. Past participle verbs include the Penn Treebank tag VBN. Formula: $VBNDensity = numVBNs / numTokens$ .  | Berechnet die Dichte der Verben im Partizip II des Textes. Verben im Partizip II beinhalten das Penn Treebank-Kennzeichen VBN. Formel: $DichteVBN = AnzahlVBN / Anzahl\ der\ Token$ .     |
| 23 | Mean Token Length in Syllables                      | Calculates the mean token length in syllables.                                                                                                               | Berechnet die mittlere Tokenlänge in Silben.                                                                                                                                              |
| 24 |                                                     |                                                                                                                                                              |                                                                                                                                                                                           |

|    |                                                 |                                                                                                                                                                                                                                                                 |                                                                                                                                                                                                                                                                                      |
|----|-------------------------------------------------|-----------------------------------------------------------------------------------------------------------------------------------------------------------------------------------------------------------------------------------------------------------------|--------------------------------------------------------------------------------------------------------------------------------------------------------------------------------------------------------------------------------------------------------------------------------------|
|    | Mean Sentence Length in Syllables               | Calculates the mean sentence length in syllables.                                                                                                                                                                                                               | Berechnet die mittlere Satzlänge in Silben.                                                                                                                                                                                                                                          |
| 25 | POS Density Feature: Adverb RB                  | Calculates adverb RB density of the text. Adverb RBs include the Penn Treebank tag VBN. Formula: $RBDensity = \frac{numRBs}{numTokens}$ .                                                                                                                       | Berechnet Adverben(RB)-Dichte des Textes. Adverben beinhalten das Penn Treebank-Kennzeichen VBN. Formel: $RBDichte = \frac{AnzahlRB}{Anzahl\ der\ Token}$ .                                                                                                                          |
| 26 | POS Density Feature: Cardinal Number            | Calculates cardinal number density of the text. Cardinal numbers include the Penn Treebank tag CD. Formula: $CDDensity = \frac{numCDs}{numTokens}$ .                                                                                                            | Berechnet die Dichte der Kardinalzahlen des Textes. Kardinalzahlen beinhalten das Penn Treebank-Kennzeichen CD. Formel: $CDDichte = \frac{AnzahlCD}{Anzahl\ der\ Token}$ .                                                                                                           |
| 27 | POS Density Feature: List Item Marker           | Calculates list item marker density of the text. List item markers include the Penn Treebank tag LS. Formula: $LSDensity = \frac{numLSs}{numTokens}$ .                                                                                                          | Berechnet die Dichte der Listenelementmarkierungen des Textes. Listenelementmarkierungen beinhalten das Penn Treebank-Kennzeichen LS. Formel: $LSDichte = \frac{AnzahlLS}{Anzahl\ der\ Token}$ .                                                                                     |
| 28 | Percentage of Tokens with More Than 2 Syllables | Calculates percentage of words tokens with more than 2 syllables                                                                                                                                                                                                | Berechnet den Anteil von Token mit mehr als zwei Silben.                                                                                                                                                                                                                             |
| 29 | POS Density Feature: Predeterminer              | Calculates predeterminer density of the text. Predeterminers include the Penn Treebank tag PDT. Formula: $PDTDensity = \frac{numPDTs}{numTokens}$ .                                                                                                             | Berechnet Dichte der Predeterminer des Textes. Predeterminer beinhalten das Penn Treebank-Kennzeichen PDT. Formel: $PDTDichte = \frac{AnzahlPDT}{Anzahl\ der\ Token}$ .                                                                                                              |
| 30 | POS Density Feature: Functional Words           | Calculates functional words density of the text. Functional words include the Penn Treebank tag CC, IN, PDT, DT, WDT, PRP, PRP\$, WP, WP\$, CD, EX, FW, LS, MD, POS, RP, SYM, TO, UH. Formula: $functionalwordDensity = \frac{numFunctionalWords}{numTokens}$ . | Berechnet die Dichte der Funktionswörter des Textes. Funktionswörter beinhalten das Penn Treebank-Kennzeichen CC, IN, PDT, DT, WDT, PRP, PRP\$, WP, WP\$, CD, EX, FW, LS, MD, POS, RP, SYM, TO, UH. Formel: $FunktionswortDichte = \frac{AnzahlFunktionswort}{Anzahl\ der\ Token}$ . |
| 31 |                                                 |                                                                                                                                                                                                                                                                 |                                                                                                                                                                                                                                                                                      |

|    |                                               |                                                                                                                                                                                                                                            |                                                                                                                                                                                                                                                                                   |
|----|-----------------------------------------------|--------------------------------------------------------------------------------------------------------------------------------------------------------------------------------------------------------------------------------------------|-----------------------------------------------------------------------------------------------------------------------------------------------------------------------------------------------------------------------------------------------------------------------------------|
|    | POS Density Feature: Modal                    | Calculates modal verb density of the text. Modal verbs include the Penn Treebank tag MD. Formula: $\text{modalDensity} = \text{numModal} / \text{numTokens}$ .                                                                             | Berechnet die Dichte der Modalverben des Textes. Die Modalverben beinhalten das Penn Treebank-Kennzeichen MD. Formel: $\text{DichteMD} = \text{AnzahlMD} / \text{Anzahl der Token}$ .                                                                                             |
| 32 | POS Density Feature: Coordinating Conjunction | Calculates coordinating conjunction density of the text. Coordinating conjunctions include the Penn Treebank tag CC. Formula: $\text{CCDensity} = \text{numCC} / \text{numTokens}$ .                                                       | Berechnet die Dichte der nebenordnenden Konjunktionen des Textes. Nebenordnende Konjunktionen beinhalten das Penn Treebank-Kennzeichen CC. Formel: $\text{CCDichte} = \text{AnzahlCC} / \text{Anzahl der Token}$ .                                                                |
| 33 | SD Token Length in Syllables                  | Calculates the standard deviation of token length in number of syllables.                                                                                                                                                                  | Berechnet die Standardabweichung der Tokenlänge in Silbenanzahl.                                                                                                                                                                                                                  |
| 34 | Number of Tokens                              | Calculates the number of tokens in the text.                                                                                                                                                                                               | Berechnet die Anzahl der Token im Text.                                                                                                                                                                                                                                           |
| 35 | POS Density Feature: Determiner               | Calculates determiner density of the text. Determiners include the Penn Treebank tag PDT, DT and WDT. Formula: $\text{detDensity} = \text{numDet} / \text{numTokens}$ .                                                                    | Berechnet die Determinantendichte des Textes. Determinanten beinhalten das Penn Treebank-Kennzeichen PDT, DT und WDT. Formel: $\text{detDichte} = \text{AnzahlDet} = \text{Anzahl der Token}$ .                                                                                   |
| 36 | POS Density Feature: Superlative Adverb       | Calculates superlative adverb density of the text. Superlative adverbs include the Penn Treebank tag RBR. Formula: $\text{RBSDensity} = \text{numRBSs} / \text{numTokens}$ .                                                               | Berechnet die Dichte von Adverbien im Superlativ des Textes. Adverbien im Superlativ beinhalten das Penn Treebank-Kennzeichen RBR. Formel: $\text{RBSDichte} = \text{AnzahlRBS} / \text{Anzahl der Token}$ .                                                                      |
| 37 | POS Density Feature: Lexical Words            | Calculates lexical word density of the text. Lexical words include the Penn Treebank tags JJ, JJR, JJS, RB, RBR, RBS, WRB, VB, VBD, VBG, VBN, VBP, VBZ. Formula: $\text{lexicalWordDensity} = \text{numLexicalWords} / \text{numTokens}$ . | Berechnet die Dichte der lexikalischen Wörter. Lexikalische Wörter beinhalten die Penn Treebank-Kennzeichen JJ, JJR, JJS, RB, RBR, RBS, WRB, VB, VBD, VBG, VBN, VBP, VBZ. Formel: $\text{LexikalischeWörterDichte} = \text{AnzahlLexikalischeWörter} / \text{Anzahl der Token}$ . |
| 38 |                                               |                                                                                                                                                                                                                                            |                                                                                                                                                                                                                                                                                   |

|    |                                           |                                                                                                                                                               |                                                                                                                                                                                            |
|----|-------------------------------------------|---------------------------------------------------------------------------------------------------------------------------------------------------------------|--------------------------------------------------------------------------------------------------------------------------------------------------------------------------------------------|
|    | Number of Sentences                       | Calculates the number of sentences in a text.                                                                                                                 | Berechnet die Anzahl der Sätze im Text.                                                                                                                                                    |
| 39 | POS Density Feature: Plural Proper Noun   | Calculates plural proper noun density of the text. Plural proper nouns include the Penn Treebank tag NNPS. Formula: $NNPSDensity = numNNPS / numTokens$ .     | Berechnet die Dichte der Eigennamen im Plural des Textes. Eigennamen im Plural beinhalten die Penn Treebank-Kennzeichen NNPS. Formel: $NNPSDichte = AnzahlNNPS / Anzahl\ der\ Token$ .     |
| 40 | POS Density Feature: Interjection         | Calculates interjection density of the text. Interjection include the Penn Treebank tag UH. Formula: $interDensity = numInter / numTokens$ .                  | Berechnet die Dichte der Interjektionen des Textes. Interjektionen beinhalten das Penn Treebank-Kennzeichen UH. Formel: $UH = InterDichte = AnzahlInter / Anzahl\ der\ Token$ .            |
| 41 | POS Density Feature: To                   | Calculates To density of the text. To include the Penn Treebank tag TO. Formula: $TODensity = numTOs / numTokens$ .                                           | Berechnet die To-Dichte des Textes. To beinhaltet das Penn Treebank-Kennzeichen TO. Formel: $TODichte = AnzahlTO / Anzahl\ der\ Token$ .                                                   |
| 42 | POS Density Feature: Base Form Verb       | Calculates base from verb density of the text. Base from verbs include the Penn Treebank tag VB. Formula: $VBDensity = numVBs / numTokens$ .                  | Berechnet die Basis aus der Verbdichte des Textes. Basis aus der Verbdichte beinhaltet das Penn Treebank-Kennzeichen VB. Formel: $VBDichte = AnzahlVB / Anzahl\ der\ Token$ .              |
| 43 | POS Density Feature: Possesive WH Pronoun | Calculates possessive WH pronoun density of the text. Possesive WH pronouns include the Penn Treebank tag WP\$. Formula: $WP$Density = numWP$s / numTokens$ . | Berechnet die Dichte der possessiven Relativsätze des Textes. Possesive Relativsätze beinhalten das Penn Treebank-Kennzeichen WP\$. Formel: $WP$Dichte = AnzahlWP$ / Anzahl\ der\ Token$ . |
| 44 | SD Sentence Length in Syllables           | Calculates the standard deviation of sentence length in number of syllables.                                                                                  | Berechnet die Standardabweichung der Satzlänge in Anzahl der Silben.                                                                                                                       |
| 45 |                                           |                                                                                                                                                               |                                                                                                                                                                                            |

|    |                                           |                                                                                                                                                                  |                                                                                                                                                                                           |
|----|-------------------------------------------|------------------------------------------------------------------------------------------------------------------------------------------------------------------|-------------------------------------------------------------------------------------------------------------------------------------------------------------------------------------------|
| 46 | POS Density Feature: Personal Pronoun     | Calculates personal pronoun density of the text. Personal pronouns include the Penn Treebank tag PRP. Formula: $PRPDensity = \frac{numPRPs}{numTokens}$ .        | Berechnet die Personalpronomendichte des Textes. Die Personalpronomen beinhalten das Penn Treebank-Kennzeichen PRP. Formel: $PRPDichte = \frac{AnzahlPRP}{Anzahl\ der\ Token}$ .          |
| 47 | POS Density Feature: Past Tense Verb      | Calculates past tense verb density of the text. Past tense verbs include the Penn Treebank tag VBD. Formula: $VBDDensity = \frac{numVBDS}{numTokens}$ .          | Berechnet die Dichte von Verben im Präteritum des Textes. Verben im Präteritum beinhalten das Penn Treebank-Kennzeichen VBD. Formel: $VBDDichte = \frac{AnzahlVBD}{Anzahl\ der\ Token}$ . |
| 48 | POS Density Feature: Verb                 | Calculates Verb density of the text. Verbs include the Penn Treebank tag VB, VBD, VBG, VBN, VBP and VBZ. Formula: $verbDensity = \frac{numVerbs}{numTokens}$ .   | Berechnet die Verbdichte des Textes. Verben beinhalten ie Penn Treebank-Kennzeichen VB, VBD, VBG, VBN, VBP und VBZ. Formel: $VerbDichte = \frac{AnzahlVerben}{Anzahl\ der\ Token}$ .      |
| 49 | POS Density Feature: Plural Noun          | Calculates plural noun density of the text. Plural nouns include the Penn Treebank tag NNS. Formula: $NNSDensity = \frac{numNNSs}{numTokens}$ .                  | Berechnet die Dichte von Substantiven im Plural. Die Substantive im Plural beinhalten das Penn Treebank-Kennzeichen NNS. Formel: $NNSDichte = \frac{AnzahlNNS}{Anzahl\ der\ Token}$ .     |
| 50 | Mean Sentence Length in Letters           | Calculates the mean sentence length in number of letters.                                                                                                        | Berechnet die mittlere Satzlänge in Anzahl der Buchstaben.                                                                                                                                |
| 51 | POS Density Feature: Adjective JJ         | Calculates adjective jj density of the text. Adjective JJs include the Penn Treebank tag JJ. Formula: $JJDensity = \frac{numJJ}{numTokens}$ .                    | Berechnet die Adjektivdichte des Textes. Adjektive beinhalten das Penn Treebank-Kennzeichen JJ. Formel: $JJDichte = \frac{AnzahlJJ}{Anzahl\ der\ Token}$ .                                |
| 52 | POS Density Feature: Singular Proper Noun | Calculates singular proper noun density of the text. Singular proper nouns include the Penn Treebank tag NNP. Formula: $NNPDensity = \frac{numNNP}{numTokens}$ . | Berechnet die Dichte von Eigennamen im Singular. Eigennamen im Singular beinhalten das Penn Treebank-Kennzeichen NNP. Formel: $NNPDichte = \frac{AnzahlNNP}{Anzahl\ der\ Token}$ .        |
| 53 | POS Density Feature: Adverb               | Calculates Adverb density of the text. Adverbs include the Penn Treebank tag RB, RBR, RBS, WRB. Formula: $advDensity = \frac{numAdverbs}{numTokens}$ .           | Berechnet die Adverbdichte des Textes. Adverben beinhalten die Penn Treebank-Kennzeichen RB, RBR, RBS und WRB. Formel: $Adverbdichte = \frac{AnzahlAdverben}{Anzahl\ der\ Token}$ .       |

|    |                                                   |                                                                                                                                                                                                    |                                                                                                                                                                                                                                        |
|----|---------------------------------------------------|----------------------------------------------------------------------------------------------------------------------------------------------------------------------------------------------------|----------------------------------------------------------------------------------------------------------------------------------------------------------------------------------------------------------------------------------------|
|    | POS Density Feature: Non 3rd Person Singular Verb | Calculates non 3rd person singular verb density of the text. Non 3rd person singular verbs include the Penn Treebank tag VBP. Formula: $VBP_{Density} = \frac{\text{numVBPs}}{\text{numTokens}}$ . | Berechnet Dichte von Verben, die nicht in der 3. Person Singular stehen. Nicht-dritte-Person-Singular-Verben beinhalten das Penn Treebank-Kennzeichen VBP. Formel: $VBP_{Dichte} = \frac{\text{AnzahlVBP}}{\text{Anzahl der Token}}$ . |
| 54 | SD Sentence Length in Letters                     | Calculates the standard deviation of sentence length in number of letters.                                                                                                                         | Berechnet die Standardabweichung der Satzlänge in Anzahl der Buchstaben.                                                                                                                                                               |
| 55 | POS Density Feature: Conjunction                  | Calculates conjunction density of the text. Conjunctions include the Penn Treebank tag CC and IN. Formula: $conj_{Density} = \frac{\text{numConjs}}{\text{numTokens}}$ .                           | Berechnet die Konjunktionsdichte des Textes. Zu den Konjunktionen gehören die Penn Treebank-Tags CC und IN. Formel: $Konj_{Dichte} = \frac{\text{AnzahlKonj}}{\text{Anzahl der Token}}$ .                                              |
| 56 | POS Density Feature: WH Adverb                    | Calculates WH Adverb density of the text. WH adverbs include the Penn Treebank tag WRB. Formula: $WRB_{Density} = \frac{\text{numWRBs}}{\text{numTokens}}$ .                                       | Berechnet die Dichte der Adverben des Textes. Adverben beinhalten das Penn Treebank-Kennzeichen WRB. Formel: $WRB_{Dichte} = \frac{\text{AnzahlWRB}}{\text{Anzahl der Token}}$ .                                                       |
| 57 | POS Density Feature: Pronoun                      | Calculates pronoun density of the text. Pronouns include the Penn Treebank tag PRP, PRP\$, WP, WP\$. Formula: $pronoun_{Density} = \frac{\text{numPronouns}}{\text{numTokens}}$ .                  | Berechnet die Pronomendichte des Textes. Pronomen beinhalten die Penn Treebank-Kennzeichen PRP, PRP\$, WP und WP\$. Formel: $Pronomen_{Dichte} = \frac{\text{AnzahlPronomen}}{\text{Anzahl der Token}}$ .                              |
| 58 | POS Density Feature: Particle                     | Calculates particle density of the text. Particles include the Penn Treebank tag RP. Formula: $RP_{Density} = \frac{\text{numRPs}}{\text{numTokens}}$ .                                            | Berechnet die Partikeldichte des Textes. Die Partikel enthalten das Penn Treebank-Kennzeichen RP. Formel: $RP_{Dichte} = \frac{\text{AnzahlRP}}{\text{Anzahl der Token}}$ .                                                            |
| 59 | POS Density Feature: Foreign Word                 | Calculates foreign word density of the text. Foreign words include the Penn Treebank tag FW. Formula: $FWD_{Density} = \frac{\text{numFWs}}{\text{numTokens}}$ .                                   | Berechnet die Fremdwortdichte des Textes. Fremdwörter beinhalten das Penn Treebank-Kennzeichen FW. Formel: $FWD_{Dichte} = \frac{\text{AnzahlFW}}{\text{Anzahl der Token}}$ .                                                          |
| 60 |                                                   |                                                                                                                                                                                                    |                                                                                                                                                                                                                                        |



|    |                                         |                                                                                                                                                            |                                                                                                                                                                                       |
|----|-----------------------------------------|------------------------------------------------------------------------------------------------------------------------------------------------------------|---------------------------------------------------------------------------------------------------------------------------------------------------------------------------------------|
|    | POS Density Feature: Comparative Adverb | Calculates comparative adverb density of the text. Comparative adverbs include the Penn Treebank tag RBR. Formula: $RBRDensity = numRBRs / numTokens$ .    | Berechnet die Dichte der Adverben im Komparativ des Textes. Komparative Adverben beinhalten das Penn Treebank-Kennzeichen RBR. Formel: $RBRDichte = AnzahlRBR / Anzahl\ der\ Token$ . |
| 61 | POS Density Feature: Possesive Pronoun  | Calculates possessive pronoun density of the text. Possesive pronouns include the Penn Treebank tag PRP\$. Formula: $PRPSDensity = numPRPSs / numTokens$ . | Berechnet die Dichte der Possessivpronomen des Textes. Possessivpronomen beinhalten das Penn Treebank-Kennzeichen PRP\$. Formel: $PRPSDichte = AnzahlPRPS / Anzahl\ der\ Token$ .     |
| 62 | POS Density Feature: Symbol             | Calculates symbol density of the text. Symbols include the Penn Treebank tag SYM. Formula: $SYMDensity = numSYMs / numTokens$ .                            | Berechnet die Symboldichte des Textes. Symbole beinhalten das Penn Treebank-Kennzeichen SYM. Formel: $SYMDichte = AnzahlSYM / Anzahl\ der\ Token$ .                                   |
| 63 | POS Density Feature: Existential There  | Calculates existential there density of the text. Existential theres include the Penn Treebank tag EX. Formula: $EXDensity = numEXs / numTokens$ .         | Berechnet die Dichte des <i>existential there</i> des Textes. Existential theres beinhalten das Penn Treebank-Kennzeichen EX. $EXDichte = AnzahlEX / Anzahl\ der\ Token$ .            |
| 64 | SD Sentence Length in Tokens            | Calculates the standard deviation of sentence length in number of tokens.                                                                                  | Berechnet die Standardabweichung der Satzlänge in Anzahl der Token.                                                                                                                   |
| 65 | POS Density Feature: Adjective          | Calculates adjective density of the text. Adjectives include the Penn Treebank tag JJ, JJR and JJS. Formula: $adjDensity = numAdjectives / numTokens$ .    | Berechnet die Adjektivdichte des Textes. Zu den Adjektiven gehören die Treebank-Kennzeichen JJ, JJR und JJS. Formel: $AdjDichte = AnzahlAdjektive / Anzahl\ der\ Token$ .             |
| 66 | POS Density Feature: WH Pronoun         | Calculates WH pronoun density of the text. WH pronouns include the Penn Treebank tag WP. Formula: $WPDensity = numWPs / numTokens$ .                       | Berechnet die Dichte der WH-Pronomen des Textes. WH-Pronomen enthalten das Penn Treebank-Kennzeichen WP. Formel: $WPDichte = AnzahlWP / Anzahl\ der\ Token$ .                         |
| 67 | POS Density Feature: Preposition        | Calculates preposition density of the text. Prepositions include the Penn Treebank tag IN. Formula: $INDensity = numINs / numTokens$ .                     | Berechnet die Präpositionsichte des Textes. Die Präpositionen enthalten das Penn Treebank-Kennzeichen IN. Formel: $INDichte = AnzahlIN / Anzahl\ der\ Token$ .                        |
| 68 |                                         |                                                                                                                                                            |                                                                                                                                                                                       |

|    |                                                                    |                                                                                                                                                                           |                                                                                                                                                                                                        |
|----|--------------------------------------------------------------------|---------------------------------------------------------------------------------------------------------------------------------------------------------------------------|--------------------------------------------------------------------------------------------------------------------------------------------------------------------------------------------------------|
| 69 | POS Density Feature: Gerund Verb                                   | Calculates gerund verb density of the text. Gerund verbs include the Penn Treebank tag VBG. Formula: $VBGDensity = \frac{numVBGs}{numTokens}$ .                           | Berechnet die Dichte der substantivierten Verben des Textes. Substantivierte Verben enthalten das Penn Treebank-Kennzeichen VBG. Formel: $VBGDichte = \frac{AnzahlVBG}{Anzahl\ der\ Token}$ .          |
| 70 | POS Density Feature: Wh-Determiner                                 | Calculates Wh-determiner density of the text. Wh-determiners include the Penn Treebank tag WDT. Formula: $WDTDensity = \frac{numWDTs}{numTokens}$ .                       | Berechnet die Dichte der Wh-Determinanten des Textes. Wh-Determinanten beinhalten das Penn Treebank-Kennzeichen WDT. Formel: $WDTDichte = \frac{AnzahlWDT}{Anzahl\ der\ Token}$ .                      |
| 71 | POS Density Feature: 3rd Person Singular Verb                      | Calculates 3rd person singular verb density of the text. 3rd person singular verbs include the Penn Treebank tag VBZ. Formula: $VBZDensity = \frac{numVBZs}{numTokens}$ . | Berechnet die Dichte der Verben in der 3. Person Singular. Verben in der 3. Person singular beinhalten das Penn Treebank-Kennzeichen VBZ. Formel: $VBZDichte = \frac{AnzahlVBZ}{Anzahl\ der\ Token}$ . |
| 72 | Number of Syntactic Constituents: Fragment T-units                 | Calculates the number of a specific syntactic constituents in the text. This feature counts the number of fragment T-units in the text.                                   | Berechnet die Anzahl eines bestimmten syntaktischen Bestandteils des Textes. Diese Funktion zählt die Anzahl der fragmentarischen T-units des Textes.                                                  |
| 73 | Lexical Sophistication Feature: Meaningfulness Colorado (AW Token) | This feature calculates lexical sophistication with the Meaningfulness Colorado norm list from the MRC Psycholinguistic Database.                                         | Berechnet die lexikalische Komplexität mit der <i>Meaningfulness Colorado norm list</i> aus der psycholinguistischen Datenbank des MRC.                                                                |
| 74 | Lexical Sophistication Feature: Thorndike Lorge (FW Token)         | This feature calculates lexical sophistication with the Thorndike-Lorge norm list of frequencies (1944), which is included in the MRC Psycholinguistic Database.          | Berechnet die lexikalische Komplexität mit der <i>Thorndike-Lorge norm list of frequencies</i> (1944), die in der psycholinguistischen Datenbank des MRC enthalten ist.                                |

|    |                                                               |                                                                                                                                                                                                                                                                                                    |                                                                                                                                                                                                                                                                                                                                              |
|----|---------------------------------------------------------------|----------------------------------------------------------------------------------------------------------------------------------------------------------------------------------------------------------------------------------------------------------------------------------------------------|----------------------------------------------------------------------------------------------------------------------------------------------------------------------------------------------------------------------------------------------------------------------------------------------------------------------------------------------|
|    | Number of Syntactic Constituents: Complex T-units             | Calculates the number of a specific syntactic constituents in the text. This feature counts the number of complex T-units in the text.                                                                                                                                                             | Berechnet die Anzahl eines bestimmten syntaktischen Bestandteils des Textes. Diese Funktion zählt die Anzahl der komplexen T-units im Text.                                                                                                                                                                                                  |
| 75 | Lexical Sophistication Feature: Age of Acquisition (LW Token) | This feature calculates lexical sophistication with the Age of Acquisition norm list by Gilhooly and Logie (1980), which is included in the MRC Psycholinguistic Database.                                                                                                                         | Berechnet die lexikalische Komplexität mit der <i>Age of Acquisition norm list</i> von Gilhooly und Logie (1980), die in der psycholinguistischen Datenbank des MRC enthalten ist.                                                                                                                                                           |
| 76 | Lexical Variation Feature: Modifier                           | Calculates lexical variation of the text. Lexical words are verbs, nouns, adjectives and adverbs. This feature calculates Modifier variation with the following formula: $\text{modifierVariation} = \frac{\text{nModifierType}}{\text{LexicalToken}} \dots$ Modifiers are adjectives and adverbs. | Berechnet die lexikalische Vielfalt des Textes. Lexikalische Wörter sind Verben, Substantive, Adjektive und Adverben. Diese Funktion berechnet die Modifikator-Variation mit der folgenden Formel: $\text{ModifikatorVariation} = \frac{\text{nModifikatorTyp}}{\text{LexikalischesToken}} \dots$ Modifikatoren sind Adjektive und Adverben. |
| 77 | Lexical Sophistication Feature: Concreteness (FW Token)       | This feature calculates lexical sophistication with the Concreteness norm list from the MRC Psycholinguistic Database.                                                                                                                                                                             | Berechnet die lexikalische Komplexität mit der <i>Concreteness norm list</i> aus der psycholinguistischen Datenbank des MRC.                                                                                                                                                                                                                 |
| 78 | Syntactic Complexity Feature: Complex Nominals per Clause     | Calculates the syntactic complexity of the text. This feature calculates the complex nominals per clause. Definition: $\frac{\# \text{ of complex nominals}}{\# \text{ of clauses}}$ .                                                                                                             | Berechnet die syntaktische Komplexität des Textes. Diese Funktion berechnet die Substantivkomposita pro <i>Clause</i> . Definition: $\frac{\# \text{ komplexer Nominale}}{\# \text{ der Sätze}}$ .                                                                                                                                           |
| 79 | Lexical Sophistication Feature: Thorndike Lorge (LW Type)     | This feature calculates lexical sophistication with the Thorndike-Lorge norm list of frequencies (1944), which is included in the MRC Psycholinguistic Database.                                                                                                                                   | Berechnet die lexikalische Komplexität mit der <i>Thorndike-Lorge norm list of frequencies</i> (1944), die in der psycholinguistischen Datenbank des MRC enthalten ist.                                                                                                                                                                      |
| 80 | Number of Syntactic Constituents: Sentences                   | Calculates the number of a specific syntactic constituents in the text. This feature counts the number of sentences in the text.                                                                                                                                                                   | Berechnet die Anzahl eines bestimmten syntaktischen Bestandteils im Text. Diese Funktion zählt die Anzahl von Sätzen im Text.                                                                                                                                                                                                                |
| 81 |                                                               |                                                                                                                                                                                                                                                                                                    |                                                                                                                                                                                                                                                                                                                                              |

|    |                                                                         |                                                                                                                                                                            |                                                                                                                                                                                    |
|----|-------------------------------------------------------------------------|----------------------------------------------------------------------------------------------------------------------------------------------------------------------------|------------------------------------------------------------------------------------------------------------------------------------------------------------------------------------|
|    | Lexical Sophistication Feature: Age of Acquisition (LW Type)            | This feature calculates lexical sophistication with the Age of Acquisition norm list by Gilhooly and Logie (1980), which is included in the MRC Psycholinguistic Database. | Berechnet die lexikalische Komplexität mit der <i>Age of Acquisition norm list</i> von Gilhooly und Logie (1980), die in der psycholinguistischen Datenbank des MRC enthalten ist. |
| 82 | Lexical Sophistication Feature: SUBTLEX Contextual Diversity (FW Token) | This feature calculates lexical sophistication with the SUBTLEX word frequency list (Contextual Diversity measure) of functional words (FW).                               | Berechnet die lexikalische Komplexität mit der <i>SUBTLEX word frequency list</i> (Maß für kontextuelle Vielfalt) <i>of functional words</i> (FW).                                 |
| 83 | Lexical Sophistication Feature: Meaningfulness Pavio (FW Token)         | This feature calculates lexical sophistication with the Meaningfulness Pavio norm list from the MRC Psycholinguistic Database.                                             | Berechnet die lexikalische Komplexität mit der <i>Meaningfulness Pavio norm list</i> aus der psycholinguistischen Datenbank des MRC.                                               |
| 84 | Lexical Sophistication Feature: SUBTLEX Contextual Diversity (LW Type)  | This feature calculates lexical sophistication with the SUBTLEX word frequency list (Contextual Diversity measure) of lexical words (LW).                                  | Berechnet die lexikalische Komplexität mit der <i>SUBTLEX word frequency list</i> (Maß für kontextuelle Vielfalt) <i>of lexical words</i> (LW).                                    |
| 85 | Lexical Sophistication Feature: Thorndike Lorge (LW Token)              | This feature calculates lexical sophistication with the Thorndike-Lorge norm list of frequencies (1944), which is included in the MRC Psycholinguistic Database.           | Berechnet die lexikalische Komplexität mit der <i>Thorndike-Lorge norm list of frequencies</i> (1944), die in der psycholinguistischen Datenbank des MRC.                          |
| 86 | Lexical Sophistication Feature: Meaningfulness Pavio (AW Type)          | This feature calculates lexical sophistication with the Meaningfulness Pavio norm list from the MRC Psycholinguistic Database.                                             | Berechnet lexikalische Komplexität mit der <i>Meaningfulness Pavio norm list</i> aus der psycholinguistischen Datenbank des MRC.                                                   |
| 87 | Lexical Sophistication Feature: Age of Acquisition (AW Type)            | This feature calculates lexical sophistication with the Age of Acquisition norm list by Gilhooly and Logie (1980), which is included in the MRC Psycholinguistic Database. | Berechnet die lexikalische Komplexität mit der <i>Age of Acquisition norm list</i> von Gilhooly und Logie (1980), die in der psycholinguistischen Datenbank des MRC enthalten ist. |
| 88 |                                                                         |                                                                                                                                                                            |                                                                                                                                                                                    |

|    |                                                                                     |                                                                                                                                                                                                       |                                                                                                                                                                                                                         |
|----|-------------------------------------------------------------------------------------|-------------------------------------------------------------------------------------------------------------------------------------------------------------------------------------------------------|-------------------------------------------------------------------------------------------------------------------------------------------------------------------------------------------------------------------------|
|    | Lexical Sophistication Feature: SUBTLEX Word Frequency (FW Token)                   | This feature calculates lexical sophistication with the SUBTLEX word frequency list of functional words (FW).                                                                                         | Berechnet die lexikalische Komplexität mit der SUBTLEX word frequency list <i>of functional words</i> (FW).                                                                                                             |
| 89 | Lexical Sophistication Feature: SUBTLEX Word Frequency (FW Type)                    | This feature calculates lexical sophistication with the SUBTLEX word frequency list of functional words (FW).                                                                                         | Berechnet die lexikalische Komplexität mit der SUBTLEX word frequency list <i>of functional words</i> (FW).                                                                                                             |
| 90 | Syntactic Complexity Feature: Coordinate Phrases per Clause                         | Calculates the syntactic complexity of the text. This feature calculates the coordinate phrases per clause. Definition: # of coordinate phrases / # of clauses.                                       | Berechnet die syntaktische Komplexität des Textes. Diese Funktion berechnet die Koordinatensätze pro <i>Clause</i> . Definition: # der Koordinatensätze / # der <i>Clauses</i> .                                        |
| 91 | Lexical Variation Feature: Verb Variation 1                                         | Calculates lexical variation of the text. Lexical words are verbs, nouns, adjectives and adverbs. This feature calculates Verb variation with the following formula: $VV1 = nVerbType / nVerbToken$ . | Berechnet lexikalische Variation des Textes. Lexikalische Wörter sind Verben, Substantive, Adjektive und Adverben. Diese Funktion berechnet die Verbvariation mit der folgenden Formel: $VV1 = nVerbtyp / nVerbToken$ . |
| 92 | Lexical Sophistication Feature: SUBTLEX Logarithmic Word Frequency (LW Type)        | This feature calculates lexical sophistication with the SUBTLEX word frequency list (Log10 word frequency measure) of lexical words (LW).                                                             | Berechnet die lexikalische Komplexität mit der <i>SUBTLEX word frequency list</i> (Log10 Worthäufigkeitsmaß) <i>of lexical words</i> (LW).                                                                              |
| 93 | Lexical Sophistication Feature: SUBTLEX Logarithmic Contextual Diversity (AW Token) | This feature calculates lexical sophistication with the SUBTLEX word frequency list (Logarithmic Contextual Diversity measure) of all words (AW).                                                     | Berechnet die lexikalische Komplexität mit der <i>SUBTLEX word frequency list</i> (Logarithmisches Maß für kontextuelle Vielfalt) <i>of all words</i> (AW).                                                             |
| 94 | Syntactic Complexity Feature: Sentence Coordination Ratio                           | Calculates the syntactic complexity of the text. This feature calculates the sentence coordination ratio. Definition: # of clauses / # of sentences.                                                  | Berechnet die syntaktische Komplexität des Textes. Diese Funktion berechnet das Satzkoordinationsverhältnisses. Definition: # der <i>Clauses</i> / # der Sätze.                                                         |
| 95 |                                                                                     |                                                                                                                                                                                                       |                                                                                                                                                                                                                         |

|     |                                                                    |                                                                                                                                                                                                                                |                                                                                                                                                                                                                                                                      |
|-----|--------------------------------------------------------------------|--------------------------------------------------------------------------------------------------------------------------------------------------------------------------------------------------------------------------------|----------------------------------------------------------------------------------------------------------------------------------------------------------------------------------------------------------------------------------------------------------------------|
|     | Lexical Sophistication Feature: Meaningfulness Colorado (FW Token) | This feature calculates lexical sophistication with the Meaningfulness Colorado norm list from the MRC Psycholinguistic Database.                                                                                              | Berechnet lexikalische Komplexität mit der <i>Meaningfulness Colorado norm list</i> von der psycholinguistischen Datenbank des MRC.                                                                                                                                  |
| 96  | Number of Syntactic Constituents: Dependent Clauses                | Calculates the number of a specific syntactic constituents in the text. This feature counts the number of dependent clauses in the text.                                                                                       | Berechnet die Anzahl eines bestimmten syntaktischen Bestandteils im Text. Diese Funktion zählt die Anzahl der abhängigen Sätze im Text.                                                                                                                              |
| 97  | Lexical Sophistication Feature: Imageability (FW Token)            | This feature calculates lexical sophistication with the Imageability norm list from the MRC Psycholinguistic Database.                                                                                                         | Diese Funktion berechnet lexikalische Komplexität mit der <i>Imageability norm list</i> aus der psycholinguistischen Datenbank des MRC.                                                                                                                              |
| 98  | Lexical Variation Feature: Corrected Verb Variation 1              | Calculates lexical variation of the text. Lexical words are verbs, nouns, adjectives and adverbs. This feature calculates verb variation with the following formula:<br>$CVV1 = nVerbType / \sqrt{2 * nVerbToken}$ .           | Berechnet die lexikalische Variation des Textes. Lexikalische Wörter sind Verben, Substantive, Adjektive und Adverben. Diese Funktion berechnet die Verbvariation mit folgender Formel: $CVV1 = nVerbTyp / \sqrt{2 * nVerbToken}$ .                                  |
| 99  | Lexical Sophistication Feature: Imageability (LW Token)            | This feature calculates lexical sophistication with the Imageability norm list from the MRC Psycholinguistic Database.                                                                                                         | Diese Funktion berechnet lexikalische Komplexität mit der <i>Imageability norm list</i> aus der psycholinguistischen Datenbank des MRC.                                                                                                                              |
| 100 | Syntactic Complexity Feature: Verb Phrases per T-unit              | Calculates the syntactic complexity of the text. This feature calculates the verb phrases per T-unit. Definition: # of verb phrases / # of T-units.                                                                            | Berechnet die syntaktische Komplexität des Textes. Diese Funktion berechnet die Verbsätze pro T-unit. Definition: # von Verbsätzen / # von T-units.                                                                                                                  |
| 101 | Lexical Variation Feature: Lexical                                 | Calculates lexical variation of the text. Lexical words are verbs, nouns, adjectives and adverbs. This feature calculates lexical variation with the following formula:<br>$lexicalVariation = nLexicalType / nLexicalToken$ . | Berechnet die lexikalische Variation des Textes. Lexikalische Wörter sind Verben, Substantive, Adjektive und Adverben. Diese Funktion berechnet lexikalische Variation mit der folgenden Formel: $LexikalischeVariation = nLexikalischerTyp / nLexikalioscheToken$ . |
| 102 |                                                                    |                                                                                                                                                                                                                                |                                                                                                                                                                                                                                                                      |

|     |                                                                         |                                                                                                                                                                     |                                                                                                                                                                            |
|-----|-------------------------------------------------------------------------|---------------------------------------------------------------------------------------------------------------------------------------------------------------------|----------------------------------------------------------------------------------------------------------------------------------------------------------------------------|
|     | Lexical Sophistication Feature: SUBTLEX Contextual Diversity (LW Token) | This feature calculates lexical sophistication with the SUBTLEX word frequency list (Contextual Diversity measure) of lexical words (LW).                           | Berechnet die lexikalische Komplexität mit der <i>SUBTLEX word frequency list</i> (Maß für kontextuelle Vielfalt) <i>of lexical words</i> (LW).                            |
| 103 | Number of Syntactic Constituents: T-units                               | Calculates the number of a specific syntactic constituents in the text. This feature counts the number of T-units in the text.                                      | Berechnet die Anzahl eines bestimmten syntaktischen Bestandteils im Text. Diese Funktion zählt die Anzahl der T-units im Text.                                             |
| 104 | Lexical Sophistication Feature: Imageability (LW Type)                  | This feature calculates lexical sophistication with the Imageability norm list from the MRC Psycholinguistic Database.                                              | Berechnet die lexikalische Komplexität mit der <i>Imageability norm list</i> aus der psycholinguistischen Datenbank des MRC.                                               |
| 105 | Syntactic Complexity Feature: Coordinate Phrases per T-unit             | Calculates the syntactic complexity of the text. This feature calculates the coordinate phrases per T-unit. Definition: # of coordinate phrases / # of T-units.     | Berechnet die syntaktische Komplexität des Textes. Diese Funktion berechnet die Koordinatensätze pro T-unit. Definition: # Koordinatensätze / # von T-units.               |
| 106 | Syntactic Complexity Feature: T-unit complexity ratio                   | Calculates the syntactic complexity of the text. This feature calculates the T-unit complexity ratio. Definition: # of clauses / # of T-units.                      | Berechnet die syntaktische Komplexität des Textes. Diese Funktion berechnet das T-unit-Komplexitätsverhältnis. Definition: # von <i>Clauses</i> / # von T-units.           |
| 107 | Lexical Sophistication Feature: Meaningfulness Colorado (FW Type)       | This feature calculates lexical sophistication with the Meaningfulness Colorado norm list from the MRC Psycholinguistic Database.                                   | Berechnet lexikalische Komplexität mit der <i>Meaningfulness Colorado norm list</i> aus der psycholinguistischen Datenbank des MRC:                                        |
| 108 | Lexical Sophistication Feature: Kucera and Francis (LW Type)            | This feature calculates lexical sophistication with the Kucera and Francis norm list of frequencies (1967), which is included in the MRC Psycholinguistic Database. | Berechnet die lexikalische Komplexität mit der <i>Kucera und Francis norm list of frequencies</i> (1967), die in der psycholinguistischen Datenbank des MRC enthalten ist. |
| 109 |                                                                         |                                                                                                                                                                     |                                                                                                                                                                            |

|     |                                                                              |                                                                                                                                                                            |                                                                                                                                                                                    |
|-----|------------------------------------------------------------------------------|----------------------------------------------------------------------------------------------------------------------------------------------------------------------------|------------------------------------------------------------------------------------------------------------------------------------------------------------------------------------|
|     | Lexical Sophistication Feature: Brown (AW Token)                             | This feature calculates lexical sophistication with the Brown norm list of frequencies by Brown (1984), which is included in the MRC Psycholinguistic Database.            | Berechnet die lexikalische Komplexität mit der <i>Brown norm list of frequencies</i> von Brown (1984), die in der psycholinguistischen Datenbank des MRC enthalten ist.            |
| 110 | Lexical Sophistication Feature: Age of Acquisition (AW Token)                | This feature calculates lexical sophistication with the Age of Acquisition norm list by Gilhooly and Logie (1980), which is included in the MRC Psycholinguistic Database. | Berechnet die lexikalische Komplexität mit der <i>Age of Acquisition norm list</i> von Gilhooly und Logie (1980), die in der psycholinguistischen Datenbank des MRC enthalten ist. |
| 111 | Lexical Sophistication Feature: Brown (LW Token)                             | This feature calculates lexical sophistication with the Brown norm list of frequencies by Brown (1984), which is included in the MRC Psycholinguistic Database.            | Berechnet die lexikalische Komplexität mit der <i>Brown norm list of frequencies</i> von Brown (1984), die in der psycholinguistischen Datenbank des MRC.                          |
| 112 | Lexical Sophistication Feature: Concreteness (AW Token)                      | This feature calculates lexical sophistication with the Concreteness norm list from the MRC Psycholinguistic Database.                                                     | Berechnet die lexikalische Komplexität mit der <i>Concreteness norm list</i> aus der psycholinguistischen Datenbank des MRC.                                                       |
| 113 | Syntactic Complexity Feature: Dependent clause ratio                         | Calculates the syntactic complexity of the text. This feature calculates the dependent clause ratio. Definition: # of dependent clauses / # of clauses.                    | Berechnet die syntaktische Komplexität des Textes. Diese Funktion berechnet das Verhältnis der abhängigen Sätze. Definition: # von abhängigen Sätzen / # von Sätzen.               |
| 114 | Lexical Sophistication Feature: SUBTLEX Logarithmic Word Frequency (AW Type) | This feature calculates lexical sophistication with the SUBTLEX word frequency list (Log10 word frequency measure) of all words (AW).                                      | Berechnet die lexikalische Komplexität mit der <i>SUBTLEX word frequency list (Log10 Wörthäufigkeitsmaß) of all words (AW)</i> .                                                   |
| 115 | Lexical Sophistication Feature: SUBTLEX Word Frequency (LW Type)             | This feature calculates lexical sophistication with the SUBTLEX word frequency list of lexical words (LW).                                                                 | Berechnet die lexikalische Komplexität mit der <i>SUBTLEX word frequency list of lexical words (LW)</i> .                                                                          |
| 116 |                                                                              |                                                                                                                                                                            |                                                                                                                                                                                    |



|     |                                                               |                                                                                                                                                                                                                    |                                                                                                                                                                                                                                                                   |
|-----|---------------------------------------------------------------|--------------------------------------------------------------------------------------------------------------------------------------------------------------------------------------------------------------------|-------------------------------------------------------------------------------------------------------------------------------------------------------------------------------------------------------------------------------------------------------------------|
|     | Lexical Sophistication Feature: Meaningfulness Pavo (LW Type) | This feature calculates lexical sophistication with the Meaningfulness Pavo norm list from the MRC Psycholinguistic Database.                                                                                      | Berechnet die lexikalische Komplexität mit der <i>Meaningsfulness Pavo norm list</i> aus der psycholinguistischen Datenbank des MRC.                                                                                                                              |
| 117 | Number of Syntactic Constituents: Coordinate Phrases          | Calculates the number of a specific syntactic constituents in the text. This feature counts the number of coordinate phrases in the text.                                                                          | Berechnet die Anzahl eines bestimmten syntaktischen Bestandteils im Text. Diese Funktion zählt die Anzahl der Koordinatensätze im Text.                                                                                                                           |
| 118 | Syntactic Complexity Feature: Mean Length of Clause           | Calculates the syntactic complexity of the text. This feature calculates the mean length of clause. Definition: # of word / # of clauses.                                                                          | Berechnet die lexikalische Komplexität des Textes. Berechnet die mittlere Länge der <i>Clauses</i> . Definition: # der Wörter / # der <i>Clauses</i> .                                                                                                            |
| 119 | Lexical Sophistication Feature: Brown (FW Token)              | This feature calculates lexical sophistication with the Brown norm list of frequencies by Brown (1984), which is included in the MRC Psycholinguistic Database.                                                    | Berechnet die lexikalische Komplexität mit der <i>Brown norm list of frequencies</i> von Brown (1984), die in der psycholinguistischen Datenbank des MRC enthalten ist.                                                                                           |
| 120 | Lexical Sophistication Feature: Kucera and Francis (AW Token) | This feature calculates lexical sophistication with the Kucera and Francis norm list of frequencies (1967), which is included in the MRC Psycholinguistic Database.                                                | Berechnet die lexikalische Komplexität mit der <i>Kucera and Francis norm list of frequencies</i> (1967), die in der psycholinguistischen Datenbank des MRC enthalten ist.                                                                                        |
| 121 | Lexical Sophistication Feature: Concreteness (LW Token)       | This feature calculates lexical sophistication with the Concreteness norm list from the MRC Psycholinguistic Database.                                                                                             | Berechnet die lexikalische Komplexität mit der <i>Concreteness norm list</i> aus der psycholinguistischen Datenbank des MRC.                                                                                                                                      |
| 122 | Lexical Variation Feature: Noun                               | Calculates lexical variation of the text. Lexical words are verbs, nouns, adjectives and adverbs. This feature calculates Noun variation with the following formula:<br>NounVariation = nNounType / nLexicalToken. | Berechnet die lexikalische Variation des Textes. Lexikalische Wörter sind Verben, Substantive, Adjektive und Adverbien. Diese Funktion berechnet die Substantiv-Variation mit der folgenden Formel:<br>SubstantivVariation = nSubstantivTyp / nLexikalischeToken. |
| 123 |                                                               |                                                                                                                                                                                                                    |                                                                                                                                                                                                                                                                   |

|     |                                                                                    |                                                                                                                                                                                                                                                              |                                                                                                                                                                                                                                                                                          |
|-----|------------------------------------------------------------------------------------|--------------------------------------------------------------------------------------------------------------------------------------------------------------------------------------------------------------------------------------------------------------|------------------------------------------------------------------------------------------------------------------------------------------------------------------------------------------------------------------------------------------------------------------------------------------|
|     | Lexical Sophistication Feature: SUBTLEX Logarithmic Contextual Diversity (AW Type) | This feature calculates lexical sophistication with the SUBTLEX word frequency list (Logarithmic Contextual Diversity measure) of all words (AW).                                                                                                            | Berechnet die lexikalische Komplexität mit der <i>SUBTLEX word frequency list</i> (Logarithmisches Maß für kontextuelle Vielfalt) <i>of all words</i> (AW).                                                                                                                              |
| 124 | Syntactic Complexity Feature: Dependent clauses per T-unit                         | Calculates the syntactic complexity of the text. This feature calculates the dependent clause per T-unit. Definition: # of dependent clauses / # of T-units.                                                                                                 | Berechnet die syntaktische Komplexität des Textes. Diese Funktion berechnet die abhängigen <i>Clauses</i> pro T-unit. Definition: # abhängiger <i>Clause</i> / # der T-units.                                                                                                            |
| 125 | Lexical Sophistication Feature: Brown (FW Type)                                    | This feature calculates lexical sophistication with the Brown norm list of frequencies by Brown (1984), which is included in the MRC Psycholinguistic Database.                                                                                              | Berechnet die lexikalische Komplexität mit der <i>Brown norm list of frequencies</i> von Brown (1984), die in der psycholinguistischen Datenbank des MRC enthalten ist.                                                                                                                  |
| 126 | Lexical Sophistication Feature: Meaningfulness Colorado (LW Type)                  | This feature calculates lexical sophistication with the Meaningfulness Colorado norm list from the MRC Psycholinguistic Database.                                                                                                                            | Berechnet die lexikalische Komplexität mit der <i>Colorado norm list</i> aus der psycholinguistischen Datenbank des MRC.                                                                                                                                                                 |
| 127 | Lexical Richness: Type Token Ratio (Log TTR)                                       | Calculates the type token ratio of a text. A word type is a no-duplicated token. This feature calculates the Bilogarithmic TTR with the formula: $\text{LogTTR} = \text{LogT} / \text{LogN}$ ... T stands for number of word types , N for number of Tokens. | Berechnet das Typ-Token-Verhältnis (TTR) eines Textes. Ein Worttyp ist ein nicht dupliziertes Token. Diese Funktion berechnet die bilogarithmische TTR mit der Formel: $\text{LogTTR} = \text{LogT} / \text{LogN}$ ... T steht für die Anzahl der Worttypen, N für die Anzahl der Token. |
| 128 | Lexical Variation Feature: Adverb                                                  | Calculates lexical variation of the text. Lexical words are verbs, nouns, adjectives and adverbs. This feature calculates Adverb variation with the following formula: $\text{adverbVariation} = \text{nAdverbType} / \text{nLexicalToken}$ .                | Berechnet die lexikalische Variation des Textes. Lexikalische Wörter sind Verben, Substantive, Adjektive und Adverben. Diese Funktion berechnet die Adverb-Variation mit der folgenden Formel: $\text{AdverbVariation} = \text{nAdverbTyp} / \text{nLexikalischeToken}$ .                |
| 129 |                                                                                    |                                                                                                                                                                                                                                                              |                                                                                                                                                                                                                                                                                          |

|     |                                                                                    |                                                                                                                                                                                                                                     |                                                                                                                                                                                                                                                               |
|-----|------------------------------------------------------------------------------------|-------------------------------------------------------------------------------------------------------------------------------------------------------------------------------------------------------------------------------------|---------------------------------------------------------------------------------------------------------------------------------------------------------------------------------------------------------------------------------------------------------------|
|     | Lexical Sophistication Feature: Concreteness (AW Type)                             | This feature calculates lexical sophistication with the Concreteness norm list from the MRC Psycholinguistic Database.                                                                                                              | Berechnet die lexikalische Komplexität mit der <i>Concreteness norm list</i> aus der psycholinguistischen Datenbank des MRC.                                                                                                                                  |
| 130 | Lexical Sophistication Feature: Imageability (AW Token)                            | This feature calculates lexical sophistication with the Imageability norm list from the MRC Psycholinguistic Database.                                                                                                              | Berechnet die lexikalische Komplexität mit der <i>Imageability norm list</i> aus der psycholinguistischen Datenbank des MRC.                                                                                                                                  |
| 131 | Lexical Richness: Type Token Ratio (Root TTR)                                      | Calculates the type token ratio of a text. A word type is a no-duplicated token. This feature calculates the root TTR with the formula: $\text{LogTTR} = T/\sqrt{N}$ ... T stands for number of word types, N for number of Tokens. | Berechnet das Typ-Token-Verhältnis (TTR) des Textes. Ein Worttyp ist ein nicht dupliziertes Token. Diese Funktion berechnet die Wurzel TTR mit der Formel: $\text{LogTTR} = T/\sqrt{N}$ ... T steht für die Anzahl der Worttypen, N für die Anzahl der Token. |
| 132 | Number of Syntactic Constituents: Fragment Clauses                                 | Calculates the number of a specific syntactic constituents in the text. This feature counts the number of fragment clauses in the text.                                                                                             | Berechnet die Anzahl eines bestimmten syntaktischen Bestandteils im Text. Diese Funktion zählt die Anzahl der <i>Fragment-Clauses</i> im Text.                                                                                                                |
| 133 | Lexical Sophistication Feature: SUBTLEX Word Frequency (LW Token)                  | This feature calculates lexical sophistication with the SUBTLEX word frequency list of lexical words (LW).                                                                                                                          | Berechnet die lexikalische Komplexität mit der <i>SUBTLEX word frequency list of lexical words</i> (LW).                                                                                                                                                      |
| 134 | Lexical Sophistication Feature: SUBTLEX Logarithmic Contextual Diversity (FW Type) | This feature calculates lexical sophistication with the SUBTLEX word frequency list (Logarithmic Contextual Diversity measure) of functional words (FW).                                                                            | Berechnet die lexikalische Komplexität mit der <i>SUBTLEX word frequency list</i> (Logarithmisches Maß für kontextuelle Vielfalt) <i>of functional words</i> (FW).                                                                                            |
| 135 | Syntactic Complexity Feature: Mean Length of T-unit                                | Calculates the syntactic complexity of the text. This feature calculates the mean length of T-units. Definition: # of words / # of T-units.                                                                                         | Berechnet die syntaktische Komplexität des Textes. Diese Funktion berechnet die mittlere Länge der T-units. Definition: # der Wörter / # der T-units.                                                                                                         |
| 136 |                                                                                    |                                                                                                                                                                                                                                     |                                                                                                                                                                                                                                                               |

|     |                                                                                     |                                                                                                                                                                                                                                   |                                                                                                                                                                                                                                                         |
|-----|-------------------------------------------------------------------------------------|-----------------------------------------------------------------------------------------------------------------------------------------------------------------------------------------------------------------------------------|---------------------------------------------------------------------------------------------------------------------------------------------------------------------------------------------------------------------------------------------------------|
|     | Lexical Sophistication Feature: SUBTLEX Contextual Diversity (AW Token)             | This feature calculates lexical sophistication with the SUBTLEX word frequency list (Contextual Diversity measure) of lexical words (LW).                                                                                         | Berechnet die lexikalische Komplexität mit der <i>SUBTLEX word frequency list</i> (Maß für kontextuelle Vielfalt) <i>of lexical words</i> (LW).                                                                                                         |
| 137 | Lexical Sophistication Feature: Concreteness (LW Type)                              | This feature calculates lexical sophistication with the Concreteness norm list from the MRC Psycholinguistic Database.                                                                                                            | Berechnet die lexikalische Komplexität mit der <i>Concreteness norm list</i> aus der psycholinguistischen Datenbank des MRC.                                                                                                                            |
| 138 | Lexical Sophistication Feature: Age of Acquisition (FW Token)                       | This feature calculates lexical sophistication with the Age of Acquisition norm list by Gilhooly and Logie (1980), which is included in the MRC Psycholinguistic Database.                                                        | Berechnet die lexikalische Komplexität mit der <i>Age of Acquisition norm list</i> von Gilhooly und Logie (1980), die in der psycholinguistischen Datenbank des MRC.                                                                                    |
| 139 | Lexical Sophistication Feature: SUBTLEX Logarithmic Word Frequency (AW Token)       | This feature calculates lexical sophistication with the SUBTLEX word frequency list (Log10 word frequency measure) of all words (AW).                                                                                             | Berechnet die lexikalische Komplexität mit der <i>SUBTLEX word frequency list</i> (Log10 Worthäufigkeitsmaß) <i>of all words</i> (AW).                                                                                                                  |
| 140 | Lexical Sophistication Feature: Meaningfulness Pavio (AW Token)                     | This feature calculates lexical sophistication with the Meaningfulness Pavio norm list from the MRC Psycholinguistic Database.                                                                                                    | Berechnet die lexikalische Komplexität mit der <i>Meaningsfulness Pavio norm list</i> aus der psycholinguistischen Datenbank des MRC.                                                                                                                   |
| 141 | Lexical Richness: Type Token Ratio (Corrected TTR)                                  | Calculates the type token ratio of a text. A word type is a no-duplicated token. This feature calculates the corrected TTR with the formula: $CTTR = T/\sqrt{2*N}$ ... T stands for number of word types, N for number of Tokens. | Berechnet das Typ-Token-Verhältnis (TTR). Ein Worttyp ist ein nicht dupliziertes Token. Diese Funktion berechnet das korrigierte TTR (CTTR) mit der Formel: $CTTR = T/\sqrt{2*N}$ ... T steht für die Anzahl der Worttypen, N für die Anzahl der Token. |
| 142 | Lexical Sophistication Feature: SUBTLEX Logarithmic Contextual Diversity (LW Token) | This feature calculates lexical sophistication with the SUBTLEX word frequency list (Logarithmic Contextual Diversity measure) of lexical words (LW).                                                                             | Berechnet die lexikalische Komplexität mit der SUBTLEX word frequency list (Logarithmisches Maß für kontextuelle Vielfalt) <i>of lexical words</i> (LW).                                                                                                |
| 143 |                                                                                     |                                                                                                                                                                                                                                   |                                                                                                                                                                                                                                                         |

|     |                                                                                    |                                                                                                                                                                  |                                                                                                                                                                             |
|-----|------------------------------------------------------------------------------------|------------------------------------------------------------------------------------------------------------------------------------------------------------------|-----------------------------------------------------------------------------------------------------------------------------------------------------------------------------|
|     | Number of Syntactic Constituents: Complex Norminal                                 | Calculates the number of a specific syntactic constituents in the text. This feature counts the number of complex norminals in the text.                         | Berechnet die Anzahl eines bestimmten syntaktischen Bestandteils im Text. Diese Funktion zählt die Anzahl der komplexen Substantiven im Text.                               |
| 144 | Lexical Sophistication Feature: SUBTLEX Logarithmic Contextual Diversity (LW Type) | This feature calculates lexical sophistication with the SUBTLEX word frequency list (Logarithmic Contextual Diversity measure) of lexical words (LW).            | Berechnet die lexikalische Komplexität mit der <i>SUBTLEX word frequency list</i> (Logarithmisches Maß für kontextuelle Vielfalt) of <i>lexical words</i> (LW).             |
| 145 | Lexical Sophistication Feature: Thorndike Lorge (FW Type)                          | This feature calculates lexical sophistication with the Thorndike-Lorge norm list of frequencies (1944), which is included in the MRC Psycholinguistic Database. | Berechnet die lexikalische Komplexität mit der <i>Thorndike-Lorge norm list of frequencies</i> (1944), die in der psycholinguistischen Datenbank des MRC enthalten ist.     |
| 146 | Syntactic Complexity Feature: Sentence Complexity Ratio                            | Calculates the syntactic complexity of the text. This feature calculates the sentence complexity ratio. Definition: # of clauses / # of sentences.               | Berechnet die syntaktische Komplexität des Textes. Diese Funktion berechnet das Satzkomplexitätsverhältnisses. Definition: # der <i>Clauses</i> / # der Sätze.              |
| 147 | Syntactic Complexity Feature: Complex Nominals per T-unit                          | Calculates the syntactic complexity of the text. This feature calculates the complex nominals per T-unit. Definition: # of complex nominals / # of T-units.      | Berechnet die syntaktische Komplexität des Textes. Diese Funktion berechnet die komplexen Substantive pro T-unit. Definition: # von komplexen Substantiven / # von T-units. |
| 148 | Lexical Sophistication Feature: SUBTLEX Logarithmic Word Frequency (LW Token)      | This feature calculates lexical sophistication with the SUBTLEX word frequency list (Log10 word frequency measure) of lexical words (LW).                        | Berechnet die lexikalische Komplexität mit der <i>SUBTLEX word frequency list</i> (Maß für Log10 Worthäufigkeit) of <i>lexical words</i> (LW).                              |
| 149 | Lexical Sophistication Feature: Meaningfulness Pavo (FW Type)                      | This feature calculates lexical sophistication with the Meaningfulness Pavo norm list from the MRC Psycholinguistic Database.                                    | Berechnet die lexikalische Komplexität mit der <i>Meaningfulness Pavo norm list</i> aus der psycholinguistischen Datenbank des MRC.                                         |
| 150 |                                                                                    |                                                                                                                                                                  |                                                                                                                                                                             |

|     |                                                                                     |                                                                                                                                                                                                                |                                                                                                                                                                                                                                         |
|-----|-------------------------------------------------------------------------------------|----------------------------------------------------------------------------------------------------------------------------------------------------------------------------------------------------------------|-----------------------------------------------------------------------------------------------------------------------------------------------------------------------------------------------------------------------------------------|
|     | Lexical Sophistication Feature: SUBTLEX Word Frequency (AW Token)                   | This feature calculates lexical sophistication with the SUBTLEX word frequency list of all words (AW).                                                                                                         | Berechnet die lexikalische Komplexität mit der <i>SUBTLEX word frequency list of all words</i> (AW).                                                                                                                                    |
| 151 | Lexical Sophistication Feature: Meaningfulness Colorado (LW Token)                  | This feature calculates lexical sophistication with the Meaningfulness Colorado norm list from the MRC Psycholinguistic Database.                                                                              | Berechnet die lexikalische Komplexität mit der <i>Meaningfulness Colorado norm list</i> aus der psycholinguistischen Datenbank des MRC.                                                                                                 |
| 152 | Lexical Sophistication Feature: SUBTLEX Logarithmic Contextual Diversity (FW Token) | This feature calculates lexical sophistication with the SUBTLEX word frequency list (Logarithmic Contextual Diversity measure) of functional words (FW).                                                       | Berechnet die lexikalische Komplexität mit der <i>SUBTLEX word frequency list</i> (Logarithmisches Maß für kontextuelle Vielfalt) <i>of functional words</i> (FW).                                                                      |
| 153 | Lexical Richness: Type Token Ratio (TTR)                                            | Calculates the type token ratio of a text. A word type is a no-duplicated token. This feature calculates the TTR with the formula: $TTR = T/N$ ... T stands for number of word types , N for number of Tokens. | Berechnet das Typ-Token-Verhältnis (TTR) eines Textes. Ein Worttyp ist ein nicht dupliziertes Token. Diese Funktion berechnet das TTR mit der Formel: $TTR = T/N$ ... T steht für die Anzahl der Worttypen, N für die Anzahl der Token. |
| 154 | Lexical Sophistication Feature: Kucera and Francis (FW Type)                        | This feature calculates lexical sophistication with the Kucera and Francis norm list of frequencies (1967), which is included in the MRC Psycholinguistic Database.                                            | Berechnet die lexikalische Komplexität mit der <i>Kucera and Francis norm list of frequencies</i> (1967), welche in der psycholinguistischen Datenbank des MRC enthalten ist.                                                           |
| 155 | Lexical Sophistication Feature: SUBTLEX Logarithmic Word Frequency (FW Type)        | This feature calculates lexical sophistication with the SUBTLEX word frequency list (Log10 word frequency measure) of functional words (FW).                                                                   | Berechnet die lexikalische Komplexität mit der <i>SUBTLEX word frequency list</i> (Log10 Worthäufigkeitsmaß) <i>of functional words</i> (FW).                                                                                           |
| 156 | Lexical Sophistication Feature: Imageability (AW Type)                              | This feature calculates lexical sophistication with the Imageability norm list from the MRC Psycholinguistic Database.                                                                                         | Berechnet die lexikalische Komplexität mit der <i>Imageability norm list</i> aus der psycholinguistischen Datenbank des MRC.                                                                                                            |
| 157 |                                                                                     |                                                                                                                                                                                                                |                                                                                                                                                                                                                                         |

|     |                                                                   |                                                                                                                                                                                                                                                               |                                                                                                                                                                                                                                                                                        |
|-----|-------------------------------------------------------------------|---------------------------------------------------------------------------------------------------------------------------------------------------------------------------------------------------------------------------------------------------------------|----------------------------------------------------------------------------------------------------------------------------------------------------------------------------------------------------------------------------------------------------------------------------------------|
|     | Lexical Variation Feature: Verb                                   | Calculates lexical variation of the text. Lexical words are verbs, nouns, adjectives and adverbs. This feature calculates Verb variation with the following formula:<br>$\text{VerbVariation} = \frac{n\text{VerbType}}{n\text{LexicalToken}}$                | Berechnet die lexikalische Variation des Textes. Lexikalische Wörter sind Verben, Substantive, Adjektive und Adverben. Diese Funktion berechnet die Verb-Variation mit der folgenden Formel:<br>$\text{VerbVariation} = \frac{n\text{VerbTyp}}{n\text{LexikalischesToken}}$            |
| 158 | Lexical Sophistication Feature: Imageability (FW Type)            | This feature calculates lexical sophistication with the Imageability norm list from the MRC Psycholinguistic Database.                                                                                                                                        | Berechnet die lexikalische Komplexität mit der <i>Imageability norm list</i> aus der psycholinguistischen Datenbank des MRC.                                                                                                                                                           |
| 159 | Lexical Sophistication Feature: Meaningfulness Colorado (AW Type) | This feature calculates lexical sophistication with the Meaningfulness Colorado norm list from the MRC Psycholinguistic Database.                                                                                                                             | Berechnet lexikalische Komplexität mit der <i>Colorado norm list</i> aus der Datenbank des MRC.                                                                                                                                                                                        |
| 160 | Lexical Variation Feature: Adjective                              | Calculates lexical variation of the text. Lexical words are verbs, nouns, adjectives and adverbs. This feature calculates Adjective variation with the following formula:<br>$\text{AdjectiveVariation} = \frac{n\text{AdjectiveType}}{n\text{LexicalToken}}$ | Berechnet die lexikalische Variation des Textes. Lexikalische Wörter sind Verben, Substantive, Adjektive und Adverben. Diese Funktion berechnet die Adjektiv-Variation mit der folgenden Formel:<br>$\text{AdjektivVariation} = \frac{n\text{AdjektivTyp}}{n\text{LexikalischeToken}}$ |
| 161 | Lexical Sophistication Feature: Meaningfulness Pavio (LW Token)   | This feature calculates lexical sophistication with the Meaningfulness Pavio norm list from the MRC Psycholinguistic Database.                                                                                                                                | Berechnet lexikalische Komplexität mit der <i>Meaningfulness Pavio norm list</i> aus der psycholinguistischen Datenbank des MRC.                                                                                                                                                       |
| 162 | Lexical Sophistication Feature: Concreteness (FW Type)            | This feature calculates lexical sophistication with the Concreteness norm list from the MRC Psycholinguistic Database.                                                                                                                                        | Berechnet die lexikalische Komplexität mit der <i>Concreteness norm list</i> aus der psycholinguistischen Datenbank des MRC.                                                                                                                                                           |
| 163 | Number of Syntactic Constituents: Clauses                         | Calculates the number of a specific syntactic constituents in the text. This feature counts the number of clauses in the text.                                                                                                                                | Berechnet die Anzahl eines bestimmten syntaktischen Bestandteils im Text. Diese Funktion zählt die Anzahl der Sätze im Text.                                                                                                                                                           |
| 164 |                                                                   |                                                                                                                                                                                                                                                               |                                                                                                                                                                                                                                                                                        |

|     |                                                                        |                                                                                                                                                                                                                                                    |                                                                                                                                                                                                                                                                        |
|-----|------------------------------------------------------------------------|----------------------------------------------------------------------------------------------------------------------------------------------------------------------------------------------------------------------------------------------------|------------------------------------------------------------------------------------------------------------------------------------------------------------------------------------------------------------------------------------------------------------------------|
|     | Lexical Sophistication Feature: Brown (LW Type)                        | This feature calculates lexical sophistication with the Brown norm list of frequencies by Brown (1984), which is included in the MRC Psycholinguistic Database.                                                                                    | Berechnet die lexikalische Komplexität mit der <i>Brown list of frequencies</i> von Brown (1984), die in der psycholinguistischen Datenbank des MRC enthalten ist.                                                                                                     |
| 165 | Lexical Sophistication Feature: SUBTLEX Contextual Diversity (FW Type) | This feature calculates lexical sophistication with the SUBTLEX word frequency list (Contextual Diversity measure) of functional words (FW).                                                                                                       | Berechnet die lexikalische Komplexität mit der <i>SUBTLEX word frequency list</i> (Maß für kontextuelle Vielfalt) <i>of functional words</i> (FW).                                                                                                                     |
| 166 | Lexical Richness: Type Token Ratio (Uber)                              | Calculates the type token ratio of a text. A word type is a no-duplicated token. This feature calculates the Uber index with the formula: $TTR = (\text{Log}N)^2 / \text{Log}(N/T)$ ... T stands for number of word types, N for number of Tokens. | Berechnet das Typ-Token-Verhältnis eines Textes. Ein Worttyp ist ein nicht dupliziertes Token. Diese Funktion berechnet den Uber-Index mit der Formel: $TTR = (\text{Log}N)^2 / \text{Log}(N/T)$ ... T steht für die Anzahl von Worttypen, N für die Anzahl der Token. |
| 167 | Lexical Sophistication Feature: Thorndike Lorge (AW Type)              | This feature calculates lexical sophistication with the Thorndike-Lorge norm list of frequencies (1944), which is included in the MRC Psycholinguistic Database.                                                                                   | Berechnet die lexikalische Komplexität mit der <i>Thorndike-Lorge norm list of frequencies</i> (1944), die in der psycholinguistischen Datenbank enthalten ist.                                                                                                        |
| 168 | Lexical Sophistication Feature: Kucera and Francis (LW Token)          | This feature calculates lexical sophistication with the Kucera and Francis norm list of frequencies (1967), which is included in the MRC Psycholinguistic Database.                                                                                | Berechnet die lexikalische Komplexität mit der <i>Kucera and Francis norm list of frequencies</i> (1967), die in der psycholinguistischen Datenbank des MRC enthalten ist.                                                                                             |
| 169 | Lexical Variation Feature: Squared Verb Variation 1                    | Calculates lexical variation of the text. Lexical words are verbs, nouns, adjectives and adverbs. This feature calculates Verb variation with the following formula: $SVV1 = n_{\text{VerbTyp}}^2 / n_{\text{VerbToken}}$ .                        | Berechnet die lexikalische Variation des Textes. Lexikalische Wörter sind Verben, Substantive, Adjektive und Adverben. Diese Funktion berechnet die Verb-Variation mit der folgenden Formel: $SVV1 = n_{\text{VerbTyp}}^2 / n_{\text{VerbToken}}$ .                    |
| 170 |                                                                        |                                                                                                                                                                                                                                                    |                                                                                                                                                                                                                                                                        |



|     |                                                                        |                                                                                                                                                                     |                                                                                                                                                                            |
|-----|------------------------------------------------------------------------|---------------------------------------------------------------------------------------------------------------------------------------------------------------------|----------------------------------------------------------------------------------------------------------------------------------------------------------------------------|
|     | Lexical Sophistication Feature: Kucera and Francis (FW Token)          | This feature calculates lexical sophistication with the Kucera and Francis norm list of frequencies (1967), which is included in the MRC Psycholinguistic Database. | Berechnet die lexikalische Komplexität mit der <i>Kucera and Francis norm list of frequencies</i> (1967), die in der psycholinguistischen Datenbank des MRC enthalten ist. |
| 171 | Syntactic Complexity Feature: Complex T-unit Ratio                     | Calculates the syntactic complexity of the text. This feature calculates the complex T-unit ratio. Definition: # of complex T-units / # of T-units.                 | Berechnet die syntaktische Komplexität des Textes. Diese Funktion berechnet das Verhältnis komplexer T-units. Definition: # komplexer T-units / # von T-units.             |
| 172 | Lexical Sophistication Feature: SUBTLEX Contextual Diversity (AW Type) | This feature calculates lexical sophistication with the SUBTLEX word frequency list (Contextual Diversity measure) of all words (LW).                               | Berechnet lexikalische Komplexität mit der <i>SUBTLEX word frequency list</i> (Maß für kontextuelle Vielfalt).                                                             |
| 173 |                                                                        |                                                                                                                                                                     |                                                                                                                                                                            |

---
